# Supplementary material for: Green extraction of phenolic compounds and carotenoids from the pulp and peel of mango criollo by sustainable emerging technologies
Source: Royal Society of Chemistry journal article supplement (doi:10.1039/d5fb00383k), 2025-10-21
Supplement: d5fb00383k1.pdf [file d5fb00383k1.pdf]

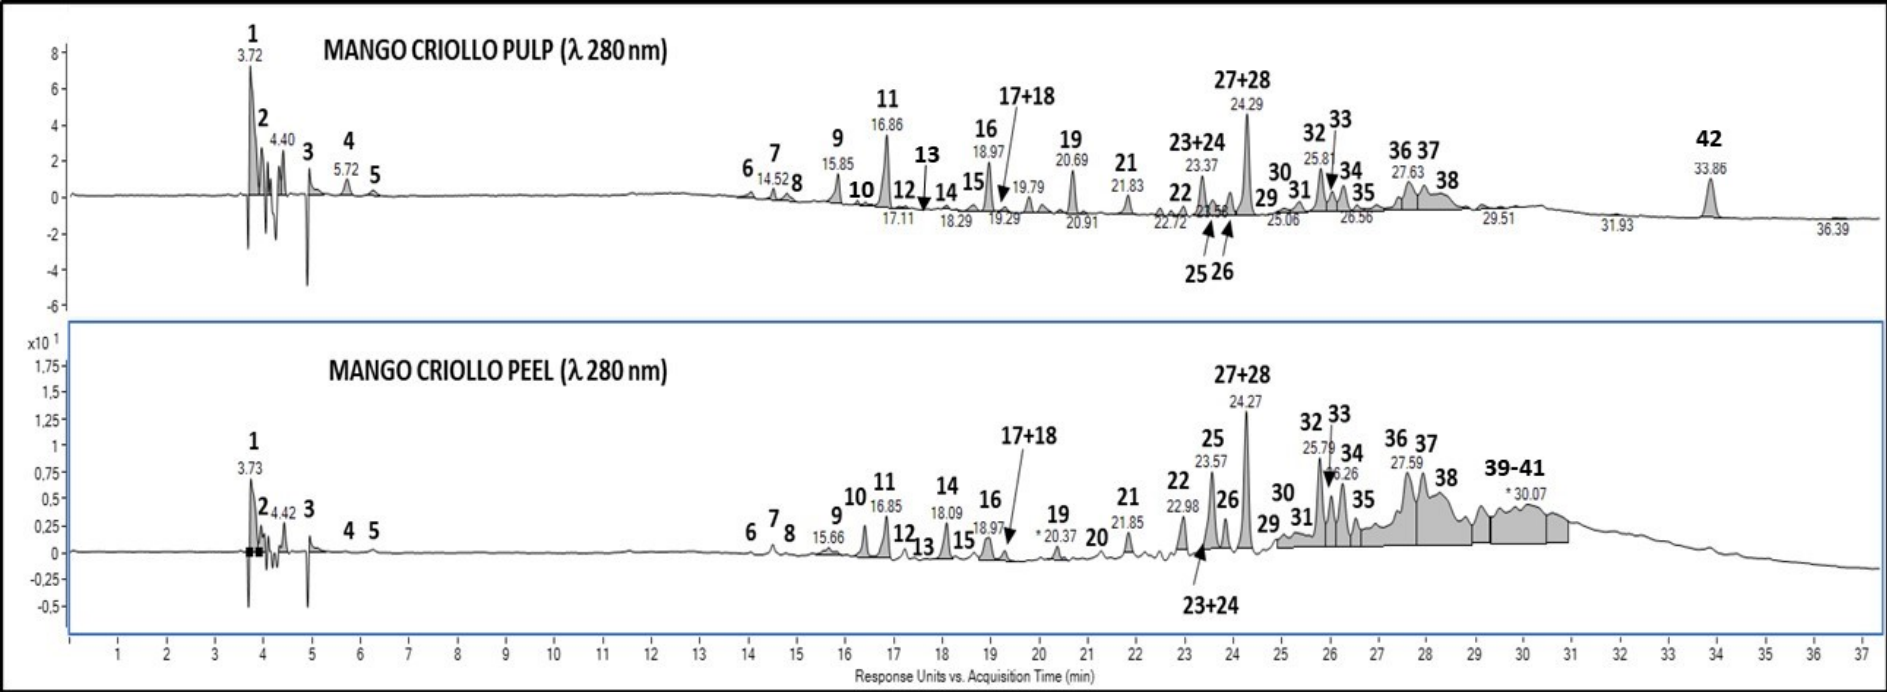

**Figure S1.** HPLC chromatogram register at  $\lambda$ 280 nm of conventional extract of peel and pulp of mango criollo. The identification of the peaks is in Table S1
